# Supplementary material for: Entomological Indicators of Malaria Transmission Prior to a Cluster Randomised Controlled Trial of a “Lethal House Lure” Intervention in Central Côte D’Ivoire
Source: Research Square preprint supplement (doi:10.21203/rs.3.rs-1146656/v1), 2021-12-21
Supplement: Supplementary file 1 [file 025065bfab4f9180e88b4dd4.docx]

***Supplementary Materials***

|  | ***Anopheles gambiae* s.l** | | | | | | |
| --- | --- | --- | --- | --- | --- | --- | --- |
| **Parameters** | **Indoor** | **IC_95%** | **Outdoor** | **IC_95%** | **Indoor Vs Outdoor** | **Total** | **IC_95%** |
| **Parity rate (%)** | 95.04 | 92.71-96.99 | 94.26 | 91.61-96.5 | OR=1.16; CI=0.94-1.45, P=0.155 | 94.66 | 92.28-96.72 |
| **Human biting rate (b/h/n)** | 21.23 | 10.64-31.81 | 18.39 | 7.80-28.97 | lmer; P=0.149 | 19.81 | 9.38-30.24 |
| **SIR (%)** | 1.64 | 0.81-2.9 | 1.46 | 0.72-2.69 | OR=1.11; CI=0.65-1.9; p=0.676 | 1.55 | 0.8-2.67 |
| **EIR(bi/h/n)** | 0.2151 | 0.1536-0.3765 | 0.2216 | 0.1104-0.3335 | lmer; p=0.485 | 0.2435 | 0.1488-0.3386 |
|  | ***Anopheles funestus* group** | | | | | | |
| **Parity rate (%)** | 98.82 | 97.44-99.66 | 98.75 | 97-99.67 | OR=1.06; CI=0.41-2.56; P=0.895 | 98.79 | 97.56-99.64 |
| **Human biting rate (b/h/n)** | 5.78 | 3.75-7.79 | 2.81 | 0.77-4.83 | lmer; p=0.0088 | 4.34 | 2.56-6.08 |
| **SIR (%)** | 3.54 | 2.03-5.54 | 6.41 | 3.81-9.88 | OR=1.86; CI=1.07-3.23, P=0.0249 | 4.66 | 2.93-6.59 |
| **EIR (bi/h/n)** | 0.2552 | 0.0675-0.4416 | 0.2519 | 0.0642-0.4383 | lmer; p=0.97 | 0.2532 | 0.0841-0.4209 |
|  | **Both malaria vectors** | | | | | | |
| **Parity rate (%)** | 96.89 | 95.06-98.26 | 96.25 | 94.07-97.9 | OR=1.21; CI=0.98-1.49; P=0.0896 | 96.6 | 94.66-98.09 |
| **Human biting rate (b/h/n)** | 25.72 | 15.19-36.24 | 20.91 | 10.42-31.40 | lmer; p=0.0229 | 23.2 | 12.84-33.56 |
| **SIR (%)** | 1.78 | 1.03-2.86 | 2.16 | 1.26-3.46 | OR=1.21; CI=0.82-1.78; P=0.315 | 1.96 | 1.17-3.02 |
| **EIR (bi/h/n)** | 0.4666 | 0.2732-0.6597 | 0.4012 | 0.2101-0.5923 | lmer; P=0.367 | 0.4324 | 0.2526-0.6122 |

*SIR* Sporozoite infection Rate; *EIR* Entomological Infection Rate; *OR* odds ratios; *lmer* linear mixed-effect models; *b/h/n* bites per human per night;*(bi/h/n)* infected bites per human per night
